# Supplementary material for: Associations between Cataract and Cognitive Impairment in a Sample of the United States Population
Source: Research Square preprint supplement (doi:10.21203/rs.3.rs-7189919/v1), 2025-10-08
Supplement: Supplementary file 1 [file 7ad6e4a2e62448f67d4d73f2.docx]

**Supplemental Table 1. Associations between cataract with sociodemographic factors and modifiable risk factors for dementia**

|  |  | **Unadjusted OR** | **95% CI** |  | **Adjusted OR21** | **95% CI** |
| --- | --- | --- | --- | --- | --- | --- |
| ***Cognitive Impairment1*** | |  |  |  |  |  |
|  | No | Reference |  |  | Reference |  |
|  | Yes | 2.31 | (2.05, 2.60) |  | 1.60 | (1.35, 1.90) |
| ***Sex2*** | |  |  |  |  |  |
|  | Male | Reference |  |  | Reference |  |
|  | Female | 1.67 | (1.50, 1.86) |  | 2.06 | (1.80, 2.35) |
| ***Age3*** | |  |  |  |  |  |
|  | < 65 | Reference |  |  | Reference |  |
|  | 65-74 | 5.24 | (4.63, 5.92) |  | 4.39 | (3.80, 5.07) |
|  | 75-84 | 8.58 | (7.35, 10.02) |  | 7.06 | (5.79, 8.6) |
|  | >84 | 6.11 | (4.45, 8.41) |  | 4.39 | (2.76, 6.99) |
| ***Region3*** | |  |  |  |  |  |
|  | Northeast | Reference |  |  | Reference |  |
|  | Midwest | 1.21 | (1.02, 1.44) |  | 1.01 | (0.82, 1.25) |
|  | South | 0.98 | (0.83, 1.15) |  | 0.93 | (0.76, 1.13) |
|  | West | 0.93 | (0.79, 1.11) |  | 1.03 | (0.83, 1.27) |
| ***Race3*** | |  |  |  |  |  |
|  | White | Reference |  |  | Reference |  |
|  | Hispanic | 0.48 | (0.39, 0.59) |  | 0.60 | (0.48, 0.76) |
|  | Black/African American | 0.76 | (0.63, 0.92) |  | 0.73 | (0.56, 0.97) |
|  | Asian | 0.50 | (0.36, 0.69) |  | 0.57 | (0.38, 0.86) |
|  | American Indian/Alaskan | 1.03 | (0.67, 1.59) |  | 1.19 | (0.69, 2.06) |
|  | Other | 0.63 | (0.28, 1.40) |  | 1.16 | (0.47, 2.83) |
| ***Income3*** | |  |  |  |  |  |
|  | >5x Poverty Threshold | Reference |  |  | Reference |  |
|  | 2-5x Poverty Threshold | 1.31 | (1.15, 1.48) |  | 0.93 | (0.80, 1.09) |
|  | 1-2x Poverty Threshold | 1.36 | (1.17, 1.59) |  | 0.79 | (0.64, 0.98) |
|  | <1x Poverty Threshold | 1.37 | (1.11, 1.70) |  | 0.74 | (0.54, 1.01) |
| ***Education4*** | |  |  |  |  |  |
|  | College | Reference |  |  |  |  |
|  | Some College | 1.09 | (0.93, 1.28) |  |  |  |
|  | High School/G.E.D. | 0.97 | (0.85, 1.100) |  |  |  |
|  | Less than High School | 0.94 | (0.77, 1.15) |  |  |  |
| ***Sexual Orientation5*** | |  |  |  |  |  |
|  | Straight | Reference |  |  |  |  |
|  | Gay, Lesbian, Bisexual | 1.19 | (0.83, 1.71) |  |  |  |
|  | Other | 1.71 | (0.54, 5.34) |  |  |  |
| ***Citizenship6*** | |  |  |  |  |  |
|  | Yes | Reference |  |  | Reference |  |
|  | No | 0.03 | (0.23, 0.50) |  | 0.72 | (0.46, 1.14) |
| ***Marital Status7*** | |  |  |  |  |  |
|  | Married | Reference |  |  | Reference |  |
|  | Cohabiting | 0.68 | (0.50, 0.91) |  | 0.82 | (0.58, 1.16) |
|  | Single | 1.36 | (1.22, 1.52) |  | 1.02 | (0.89, 1.17) |
| ***Insurance8*** | |  |  |  |  |  |
|  | Covered | Reference |  |  | Reference |  |
|  | Not Covered | 0.30 | (0.20, 0.44) |  | 0.99 | (0.63, 1.57) |
| ***Urban/Rural9*** | |  |  |  |  |  |
|  | Large Central Metropolitan | Reference |  |  | Reference |  |
|  | Large Fringe Metropolitan | 1.15 | (0.98, 1.34) |  | 1.05 | (0.87, 1.26) |
|  | Medium/Small Metropolitan | 1.29 | (1.10, 1.51) |  | 1.11 | (0.92, 1.35) |
|  | Nonmetropolitan | 1.60 | (1.35, 1.89) |  | 1.13 | (0.91, 1.40) |
| ***General Health Status10*** | |  |  |  |  |  |
|  | Good | Reference |  |  | Reference |  |
|  | Fair | 1.68 | (1.46, 1.93) |  | 1.24 | (1.01, 1.53) |
|  | Poor | 2.06 | (1.61, 2.65) |  | 0.97 | (0.60, 1.59) |
| ***Have a usual place for care11*** | |  |  |  |  |  |
|  | Yes | Reference |  |  | Reference |  |
|  | No | 0.38 | (0.27, 0.51) |  | 0.76 | (0.54, 1.09) |
| ***High Cholesterol12*** | |  |  |  |  |  |
|  | No | Reference |  |  | Reference |  |
|  | Yes | 2.11 | (1.89, 2.36) |  | 1.49 | (1.30, 1.71) |
| ***Depression13*** | |  |  |  |  |  |
|  | No | Reference |  |  | Reference |  |
|  | Yes | 1.53 | (1.34, 1.75) |  | 1.02 | (0.84, 1.25) |
| ***Traumatic Brain Injury14*** | |  |  |  |  |  |
|  | No | Reference |  |  | Reference |  |
|  | Yes | 1.18 | (1.03, 1.34) |  | 1.24 | (1.05, 1.46) |
| ***Smoking15*** | |  |  |  |  |  |
|  | No | Reference |  |  | Reference |  |
|  | Yes | 1.22 | (1.09, 1.37) |  | 0.95 | (0.83, 1.09) |
| ***Diabetes16*** | |  |  |  |  |  |
|  | No | Reference |  |  | Reference |  |
|  | Yes | 2.19 | (1.91, 2.51) |  | 1.60 | (1.33, 1.92) |
| ***Hypertension17*** | |  |  |  |  |  |
|  | No | Reference |  |  | Reference |  |
|  | Yes | 1.91 | (1.72, 2.13) |  | 1.25 | (1.08, 1.44) |
| ***Social Isolation18*** | |  |  |  |  |  |
|  | No | Reference |  |  | Reference |  |
|  | Yes | 1.45 | (1.23, 1.69) |  | 0.76 | (0.56, 1.02) |
| ***Lack of exercise19*** | |  |  |  |  |  |
|  | No | Reference |  |  | Reference |  |
|  | Yes | 2.24 | (1.97, 2.56) |  | 1.33 | (1.11, 1.59) |
| ***Hearing Impairment20*** | |  |  |  |  |  |
|  | Good hearing | Reference |  |  | Reference |  |
|  | Poor hearing | 2.26 | (2.01, 2.55) |  | 1.44 | (1.24, 1.68) |

1n=14,414, 2n=14,420, 3n=14,422, 4n=14,354, 5n=13,690, 6n=13,822, 7n=13,835, 8n=14,389, 9n=14,422, 10n=14,410, 11n=14,313, 12n=14,382, 13n=14,405, 14n=13,438, 15n=13,914, 16n=14,415, 17n=14,404, 18n=14,412, 19n=12.865, 20n=13,907, 21n=11,916

**Supplemental Table 2. Sensitivity analysis of associations between both cataract and vision difficulty with sociodemographic factors and modifiable risk factors for dementia**

|  |  | **Unadjusted OR** | **95% CI** |  | **Adjusted OR19** | **95% CI** |
| --- | --- | --- | --- | --- | --- | --- |
| ***Cognitive Impairment1*** | |  |  |  |  |  |
|  | No | Reference |  |  | Reference |  |
|  | Yes | 3.45 | (2.78, 4.29) |  | 1.87 | (1.34, 2.46) |
| ***Sex2*** | |  |  |  |  |  |
|  | Male | Reference |  |  | Reference |  |
|  | Female | 1.57 | (1.28, 1.99) |  | 1.90 | (1.42, 2.56) |
| ***Age3*** | |  |  |  |  |  |
|  | < 65 | Reference |  |  | Reference |  |
|  | 65-74 | 4.22 | (3.31, 5.37) |  | 3.32 | (2.47, 4.46) |
|  | 75-84 | 8.83 | (6.58, 11.85) |  | 5.69 | (3.75, 8.63) |
|  | >84 | 7.05 | (4.22, 11.80) |  | 3.36 | (1.44, 7.89) |
| ***Region3*** | |  |  |  |  |  |
|  | Northeast | Reference |  |  | Reference |  |
|  | Midwest | 1.27 | (0.89, 1.81) |  | 1.04 | (0.72, 1.28) |
|  | South | 1.40 | (1.01, 1.93) |  | 1.22 | (0.81, 1.84) |
|  | West | 1.41 | (0.99, 2.02) |  | 1.22 | (0.81, 1.84) |
| ***Race3*** | |  |  |  |  |  |
|  | White | Reference |  |  | Reference |  |
|  | Hispanic | 0.74 | (0.50, 1.09) |  | 0.63 | (0.40, 0.98) |
|  | Black/African American | 0.75 | (0.53, 1.06) |  | 0.56 | (0.33, 0.92) |
|  | Asian | 0.21 | (0.09, 0.48) |  | 0.17 | (0.48, 0.62) |
|  | American Indian/Alaskan | 1.54 | (0.65, 3.70) |  | 1.77 | (0.64, 4.93) |
|  | Other | 0.17 | (0.02, 1.22) |  | 0.32 | (0.04, 2.48) |
| ***Income3*** | |  |  |  |  |  |
|  | >5x Poverty Threshold | Reference |  |  | Reference |  |
|  | 2-5x Poverty Threshold | 1.21 | (0.94, 1.56) |  | 0.79 | (0.58, 1.09) |
|  | 1-2x Poverty Threshold | 1.83 | (1.37, 2.44) |  | 0.69 | (0.45, 1.06) |
|  | <1x Poverty Threshold | 2.16 | (1.51, 3.10) |  | 0.95 | (0.54, 1.68) |
| ***Education4*** | |  |  |  |  |  |
|  | College | Reference |  |  |  |  |
|  | Some College | 1.25 | (0.92, 1.71) |  |  |  |
|  | High School/General Education Diploma | 1.00 | (0.78, 1.30) |  |  |  |
|  | Less than High School | 1.45 | (1.03, 2.03) |  |  |  |
| ***Sexual Orientation5*** | |  |  |  |  |  |
|  | Straight | Reference |  |  |  |  |
|  | Gay, Lesbian, Bisexual | 1.00 | (0.41, 2.40) |  |  |  |
|  | Other | 2.40 | (0.49, 11.77) |  |  |  |
| ***Citizenship6*** | |  |  |  |  |  |
|  | Yes | Reference |  |  | Reference |  |
|  | No | 0.60 | (0.31, 1.16) |  | 1.30 | (0.61, 2.74) |
| ***Marital Status7*** | |  |  |  |  |  |
|  | Married | Reference |  |  | Reference |  |
|  | Cohabiting | 0.49 | (0.25, 0.93) |  | 0.57 | (0.27, 1.17) |
|  | Single | 1.43 | (1.15, 1.77) |  | 0.86 | (0.64, 1.14) |
| ***Insurance8*** | |  |  |  |  |  |
|  | Covered | Reference |  |  | Reference |  |
|  | Not Covered | 0.46 | (0.23, 0.91) |  | 1.00 | (0.44, 2.27) |
| ***Urban/Rural3*** | |  |  |  |  |  |
|  | Large Central Metropolitan | Reference |  |  | Reference |  |
|  | Large Fringe Metropolitan | 0.96 | (0.70, 1.33) |  | 0.96 | (0.65, 1.41) |
|  | Medium/Small Metropolitan | 1.35 | (1.00, 1.81) |  | 1.18 | (0.84, 1.66) |
|  | Nonmetropolitan | 1.64 | (1.20, 2.24) |  | 1.06 | (0.71, 1.58) |
| ***General Health Status9*** | |  |  |  |  |  |
|  | Good | Reference |  |  | Reference |  |
|  | Fair | 3.11 | (2.44, 3.98) |  | 2.05 | (1.42, 2.96) |
|  | Poor | 4.82 | (3.34, 6.96) |  | 1.79 | (0.34, 1.96) |
| ***Have a usual place for care9*** | |  |  |  |  |  |
|  | Yes | Reference |  |  | Reference |  |
|  | No | 0.45 | (0.27, 0.75) |  | 0.96 | (0.52, 1.76) |
| ***High Cholesterol10*** | |  |  |  |  |  |
|  | No | Reference |  |  | Reference |  |
|  | Yes | 1.92 | (1.57, 2.35) |  | 1.36 | (1.04, 1.78) |
| ***Depression11*** | |  |  |  |  |  |
|  | No | Reference |  |  | Reference |  |
|  | Yes | 2.10 | (1.68, 2.63) |  | 1.00 | (0.69, 1.44) |
| ***Traumatic Brain Injury12*** | |  |  |  |  |  |
|  | No | Reference |  |  | Reference |  |
|  | Yes | 1.10 | (0.84, 1.45) |  | 0.97 | (0.70, 1.43) |
| ***Smoking13*** | |  |  |  |  |  |
|  | No | Reference |  |  | Reference |  |
|  | Yes | 1.45 | (1.16, 1.81) |  | 1.06 | (0.81, 1.39) |
| ***Diabetes14*** | |  |  |  |  |  |
|  | No | Reference |  |  | Reference |  |
|  | Yes | 2.50 | (1.96, 3.20) |  | 1.23 | (0.92, 1.63) |
| ***Hypertension15*** | |  |  |  |  |  |
|  | No | Reference |  |  | Reference |  |
|  | Yes | 1.93 | (1.56, 2.39) |  | 1.23 | (0.92, 1.63) |
| ***Social Isolation16*** | |  |  |  |  |  |
|  | No | Reference |  |  | Reference |  |
|  | Yes | 2.91 | (2.25, 3.77) |  | 0.98 | (0.58, 1.65) |
| ***Lack of exercise17*** | |  |  |  |  |  |
|  | No | Reference |  |  | Reference |  |
|  | Yes | 3.39 | (2.64, 4.35) |  | 1.72 | (1.21, 2.43) |
| ***Hearing Impairment18*** | |  |  |  |  |  |
|  | Good hearing | Reference |  |  | Reference |  |
|  | Poor hearing | 3.03 | (2.44, 3.78) |  | 1.61 | (1.17, 2.23) |

112,741, 212,747, 3 12,749, 412,684,  512,064, 612,185, 712,196, 812,717, 812,738, 912,645, 1012,713, 1112,733, 1211,866, 1312,272, 1412,742, 1512,732,  1612,740, 1711,456, 1812,264,  1910,592
